# Supplementary material for: Comparison of BCYEα+AB agar and MWY agar for detection and enumeration of Legionella spp. in hospital water samples
Source: PubMed Central journal article supplement (PMC7885575; doi:10.1186/s12866-021-02109-1), 2021-02-16
Supplement: 12866_2021_2109_MOESM1_ESM.pdf [file 12866_2021_2109_MOESM1_ESM.pdf]

Examples of plates with different level of background flora from complete **absence** (zero) to massive contamination (3+)

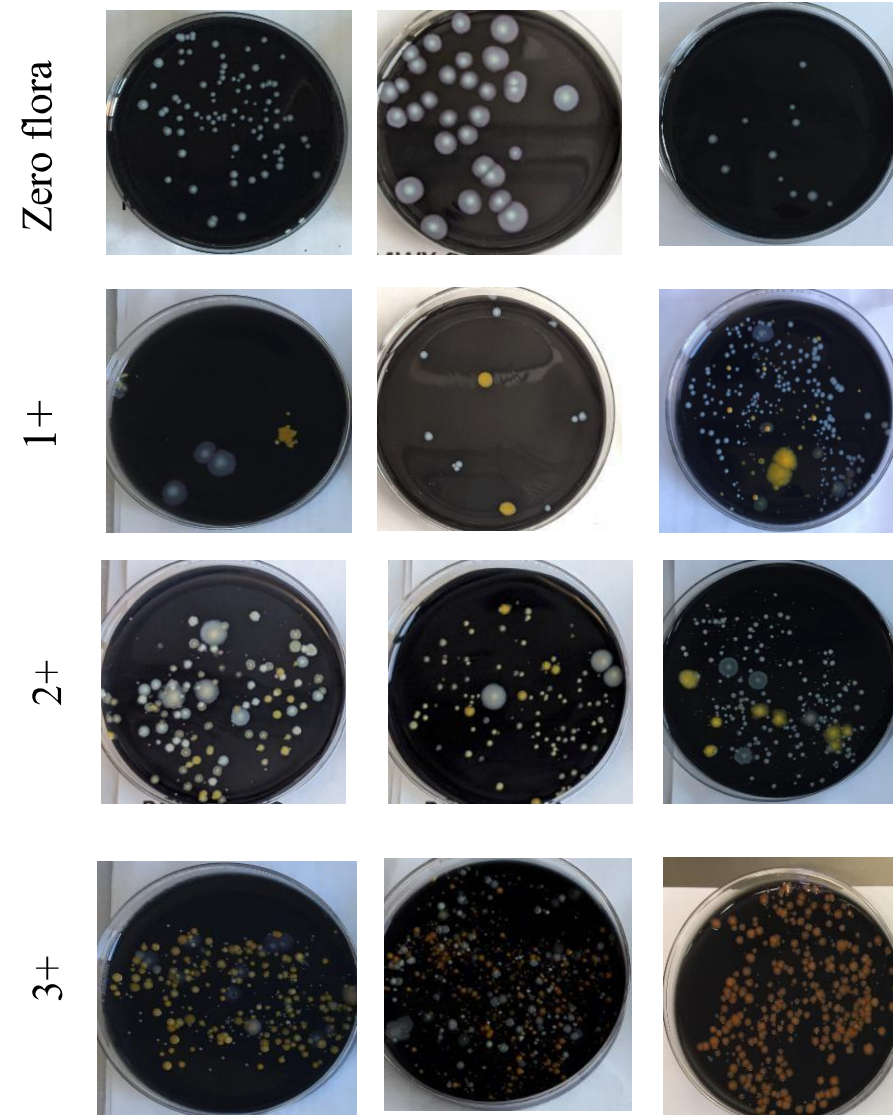

*Comparison of BCYE +AB Agar and MWY agar for Detection and Enumeration of Legionella spp. in hospital water samples*  
Savina Ditommaso, Monica Giacomuzzi, Gabriele Memoli, Jacopo Garlasco and Carla M. Zotti1

Corresponding author: savina.ditommaso@unito.it; Department of Public Health and Pediatrics, University of Turin, 10100 Turin, Italy
