# Supplementary material for: Comparison of BCYEα+AB agar and MWY agar for detection and enumeration of Legionella spp. in hospital water samples
Source: PubMed Central journal article supplement (PMC7885575; doi:10.1186/s12866-021-02109-1), 2021-02-16
Supplement: 12866_2021_2109_MOESM2_ESM.pdf [file 12866_2021_2109_MOESM2_ESM.pdf]

**EXAMPLES of CONCORDANT POSITIVE SAMPLES (MWY agar on the left and BCYE+AB agar on the right)**

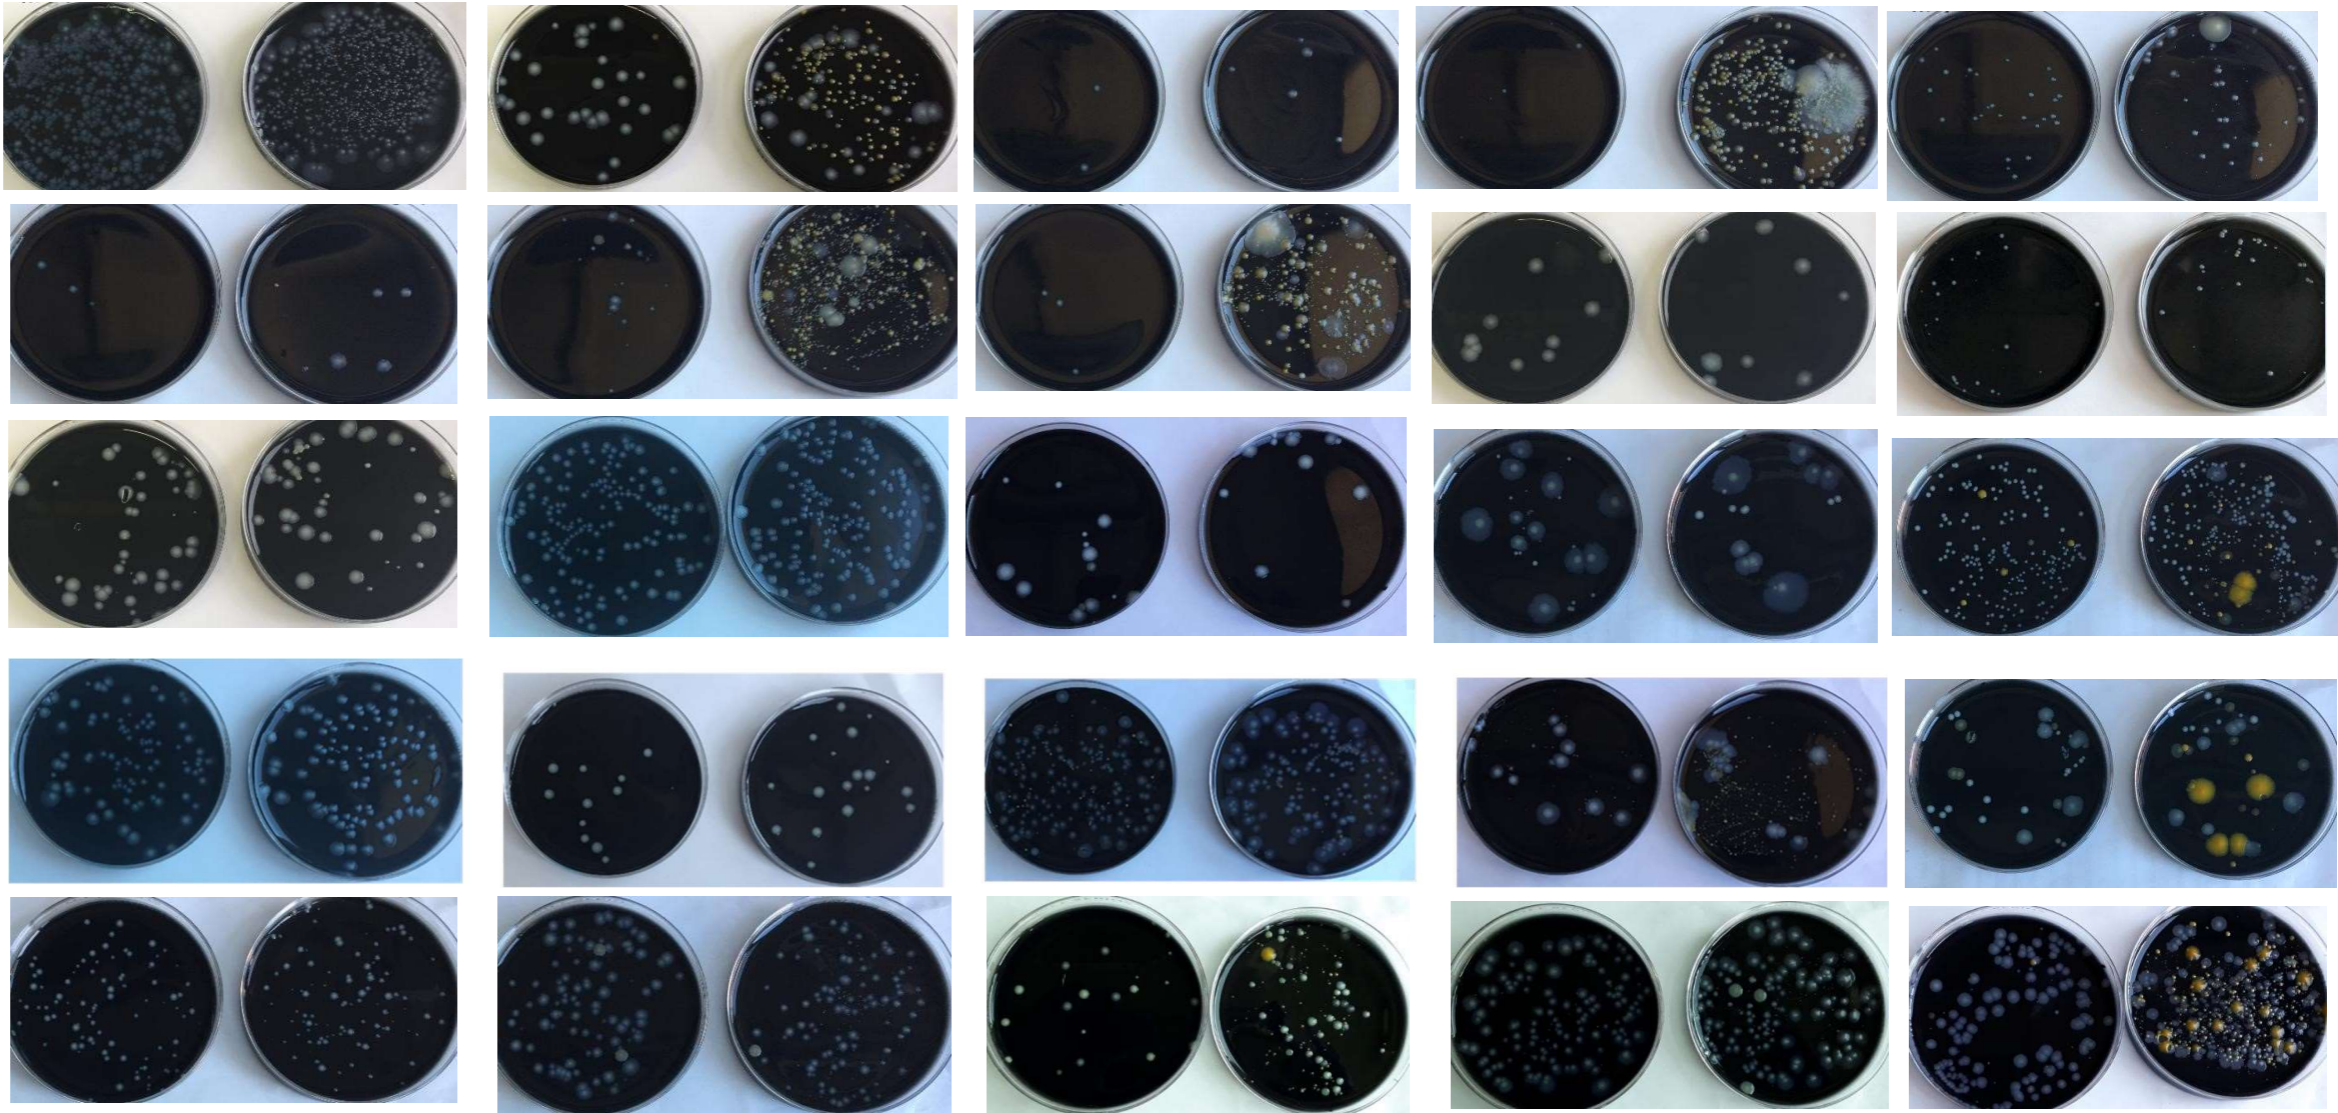

**EXAMPLES of CONCORDANT POSITIVE SAMPLES (MWY agar on the left and BCYE+AB agar on the right)**

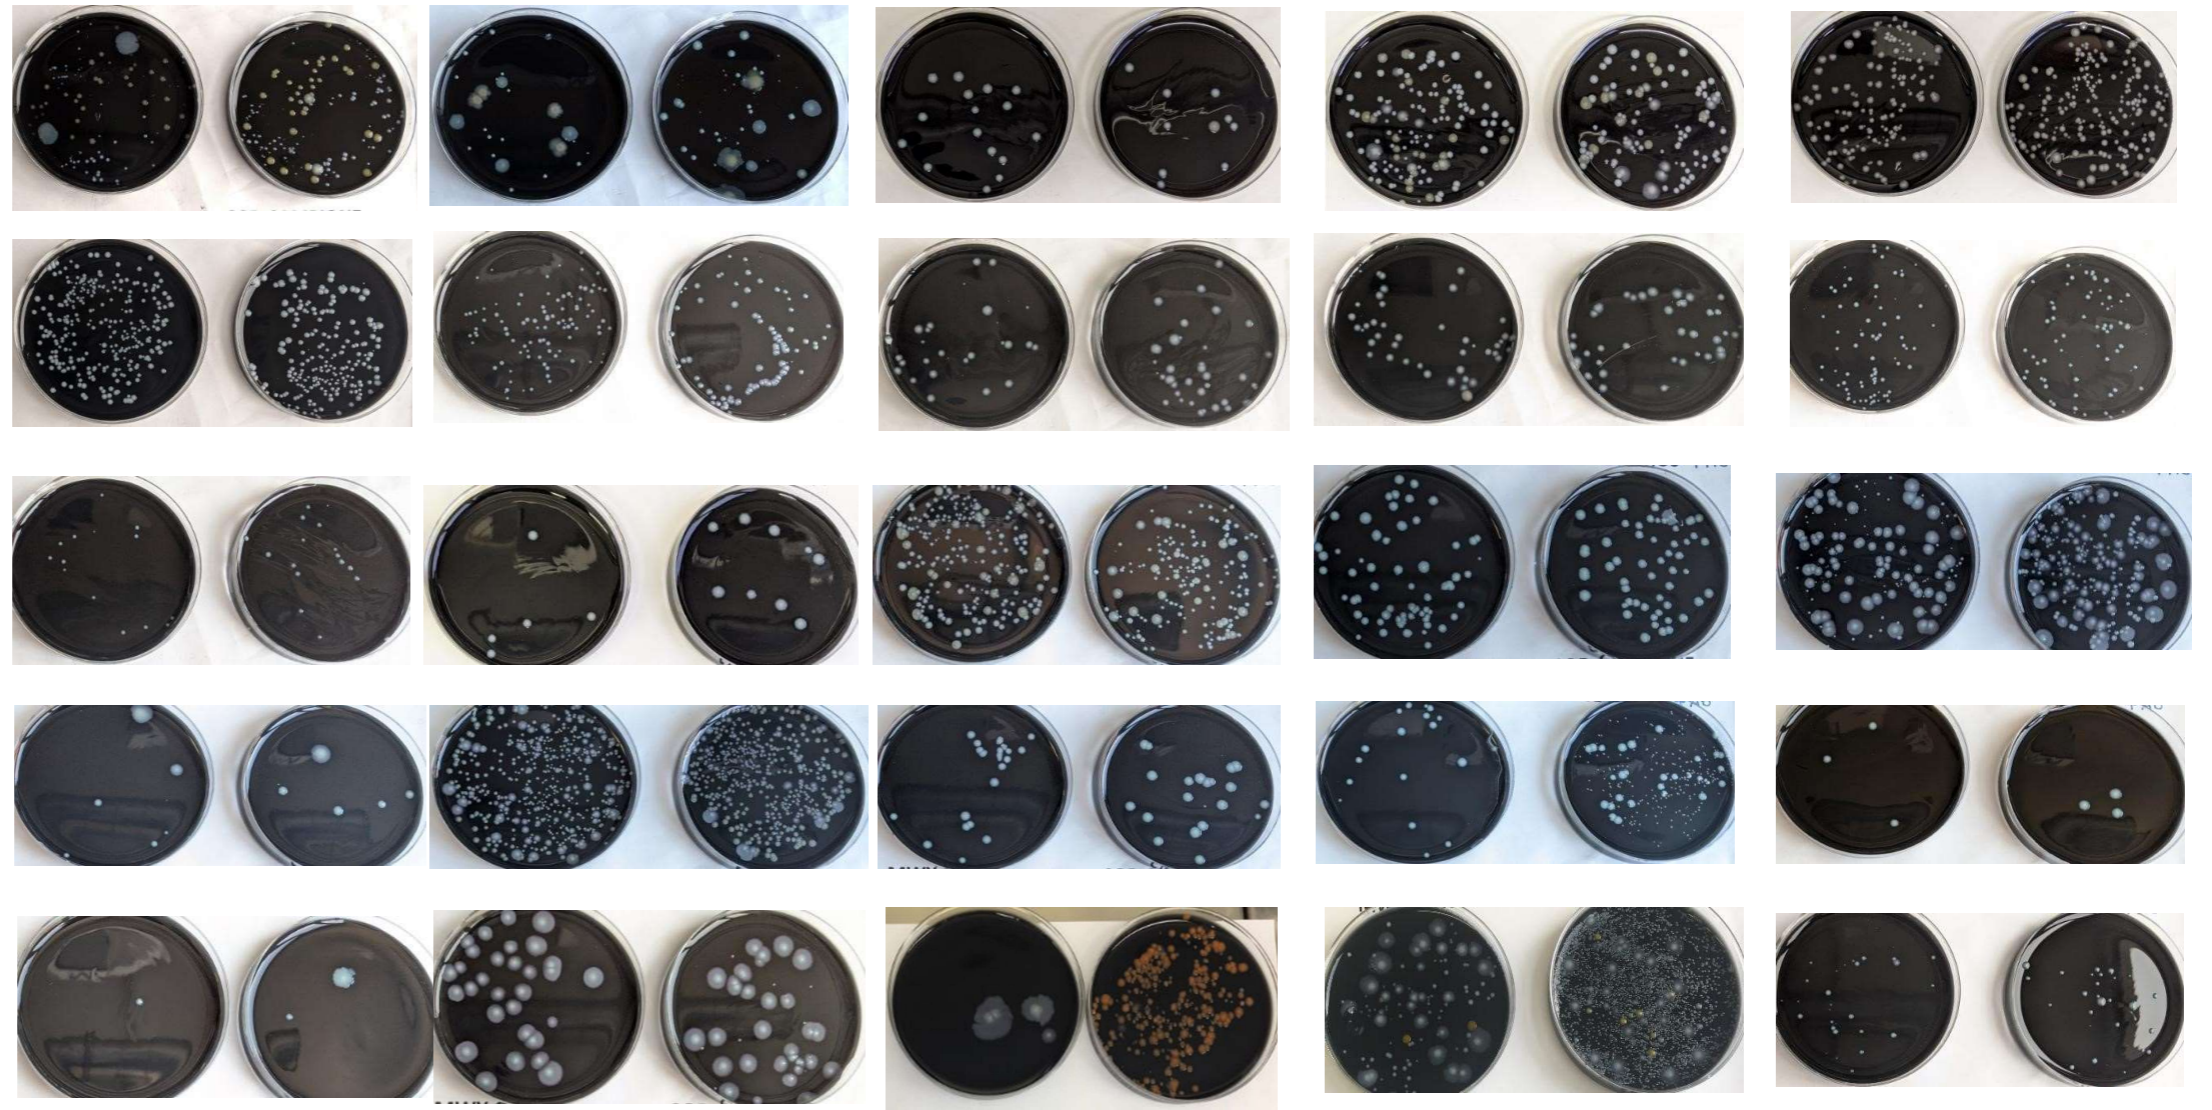

**SAMPLES POSITIVE ONLY ON MWY agar**

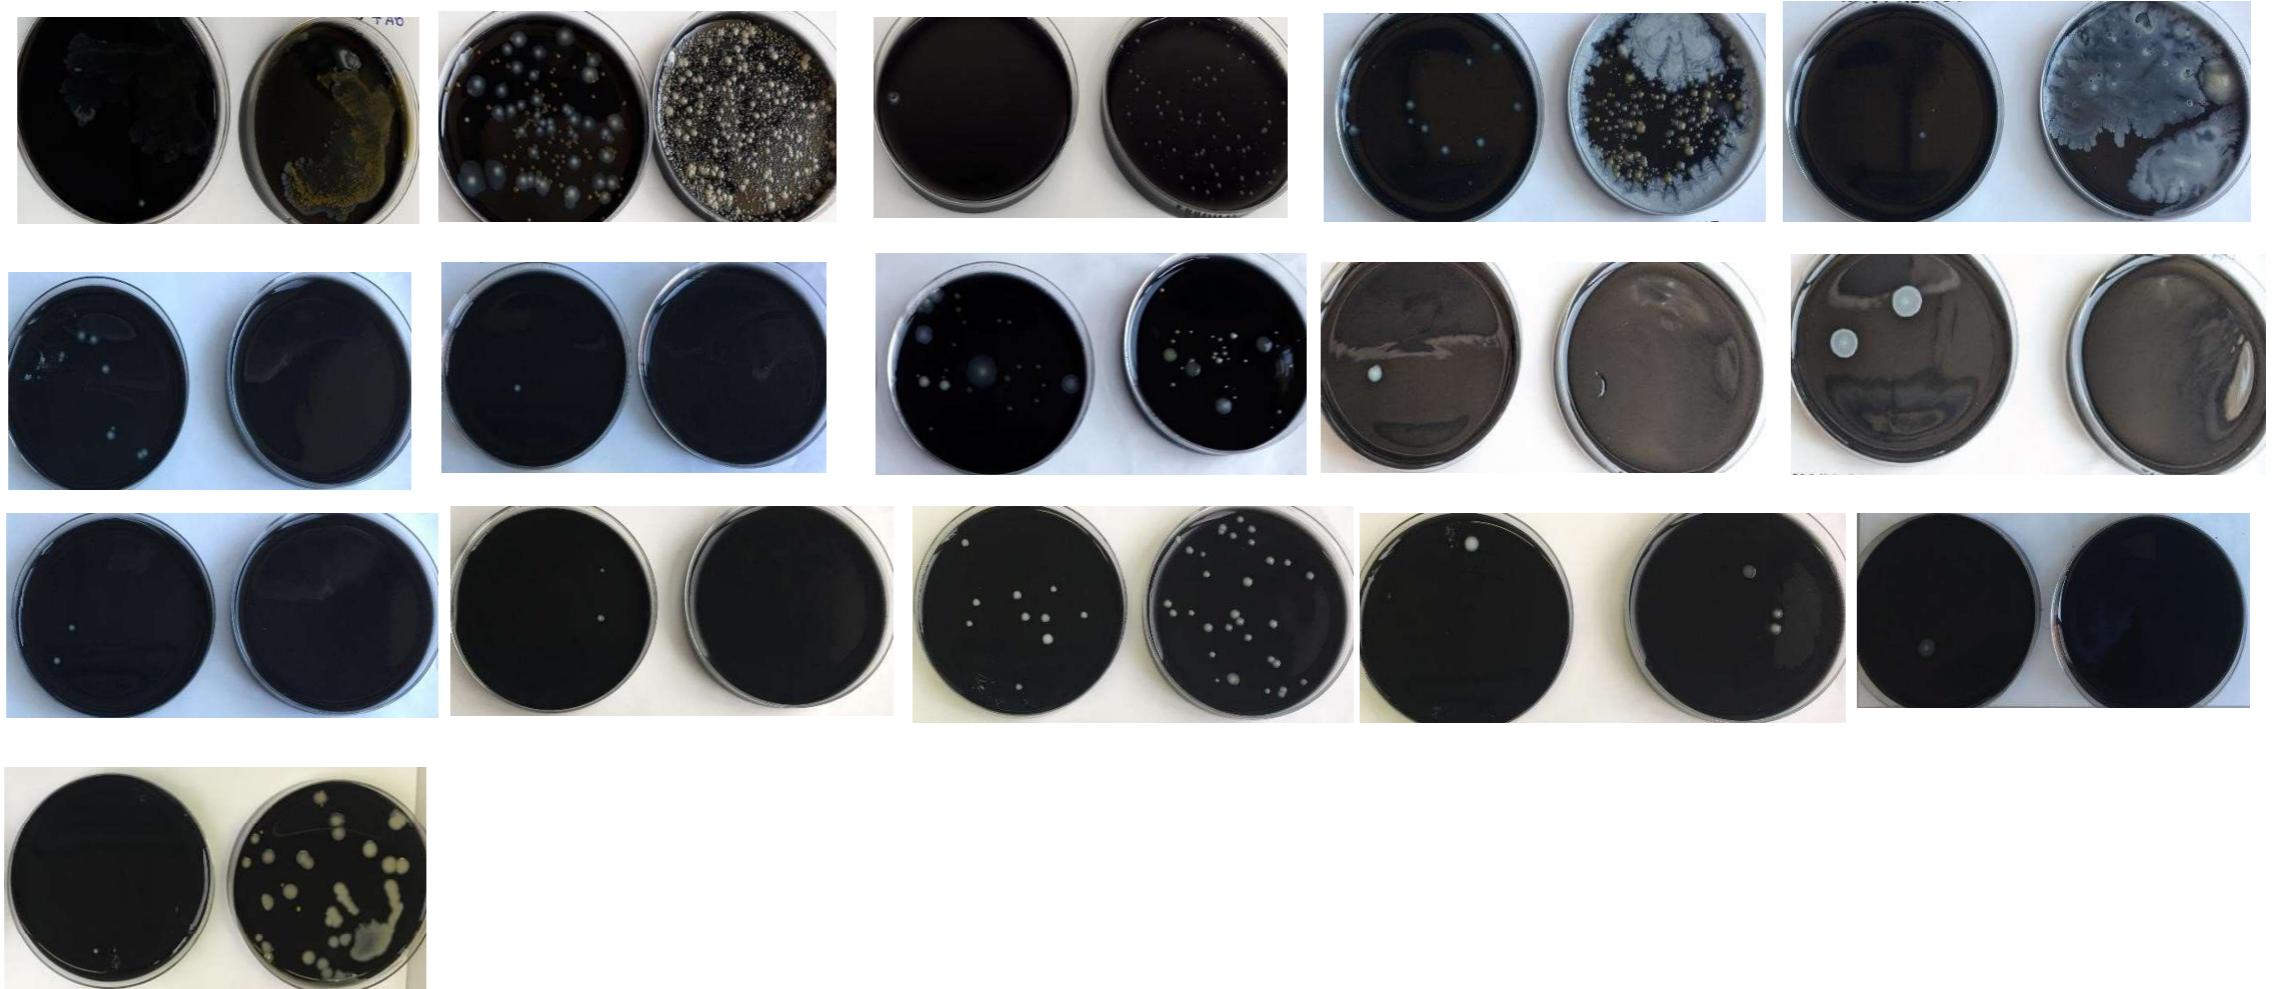

**SAMPLES POSITIVE ONLY ON BCYE+AB agar**

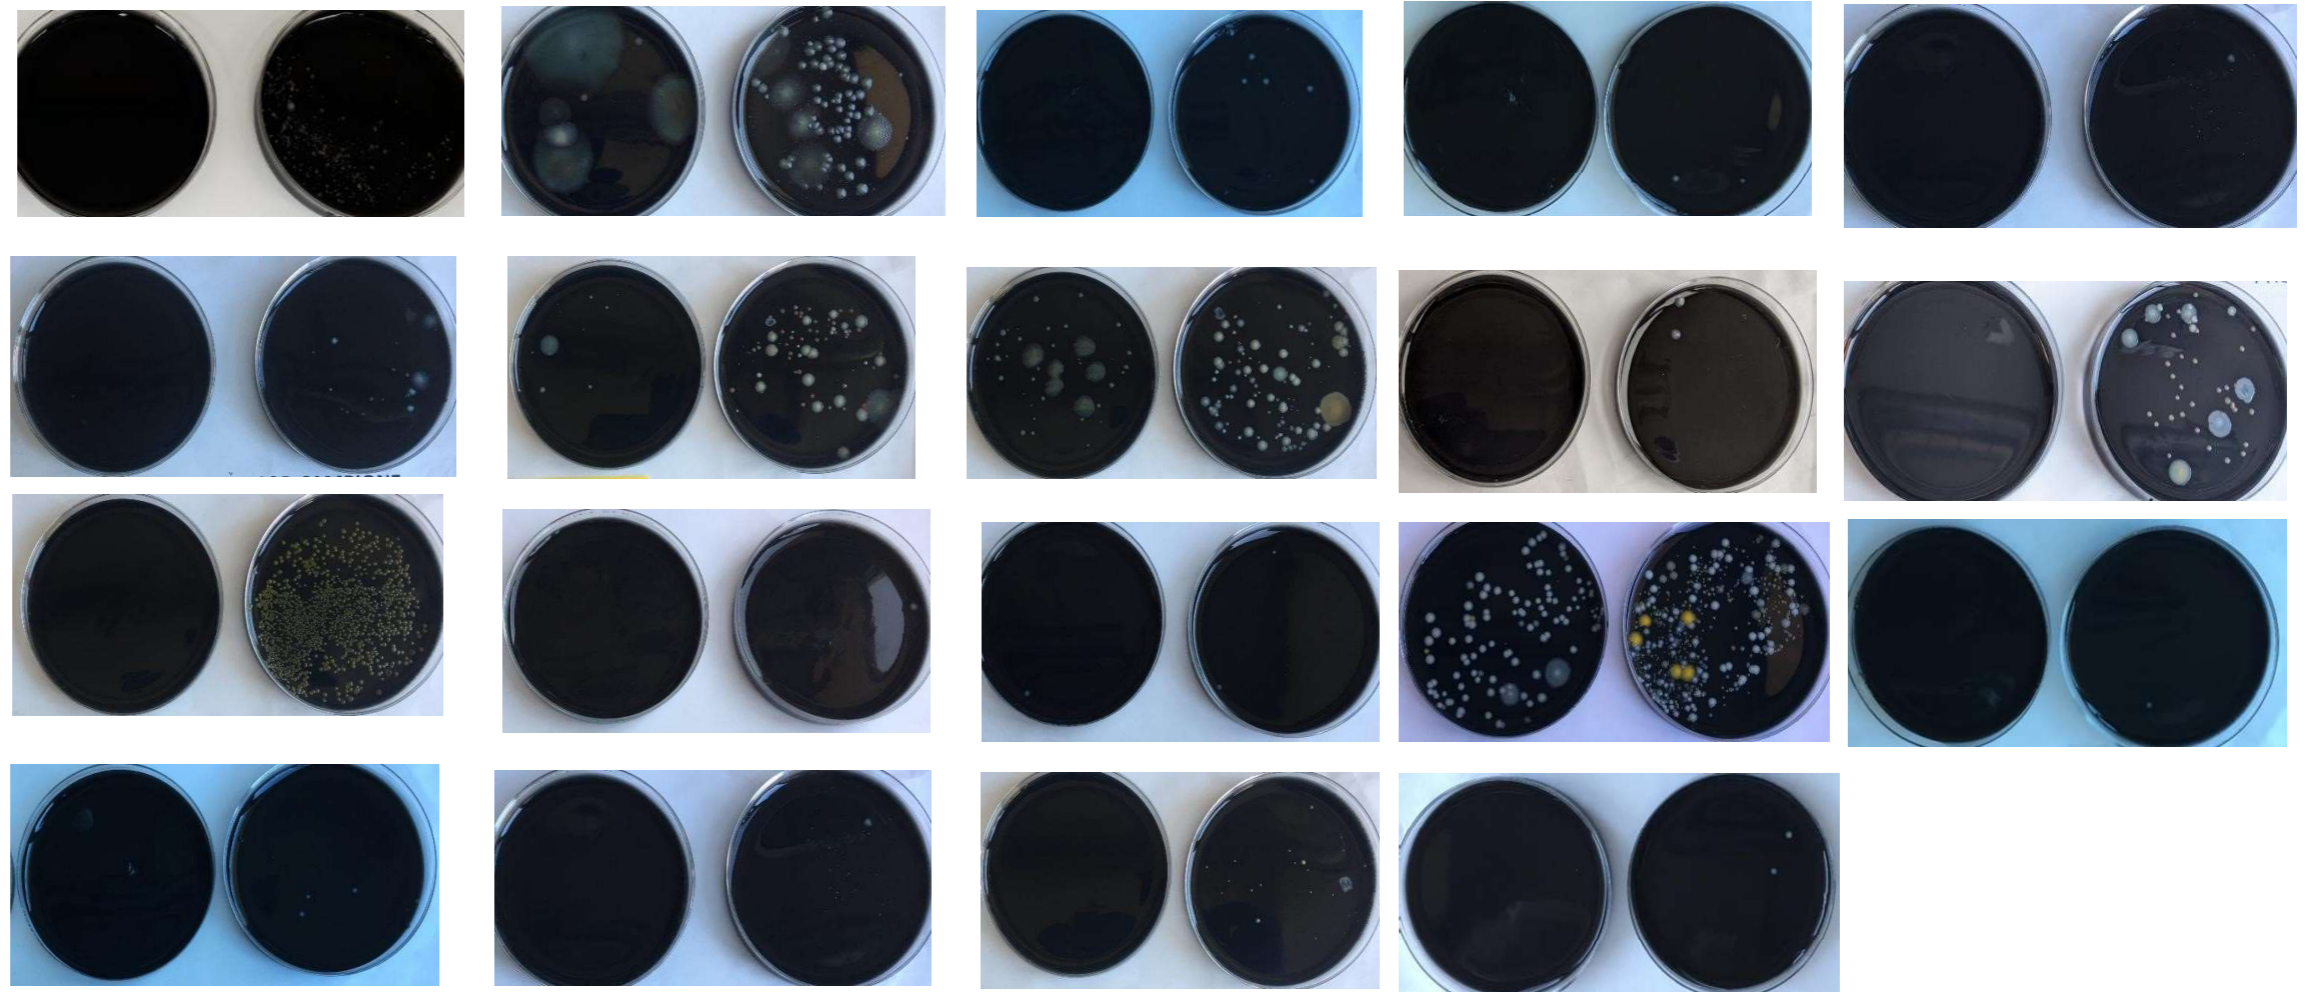

**EXAMPLES OF SAMPLES WITH OVERGROWTH ONLY ON BCYE+AB agar**

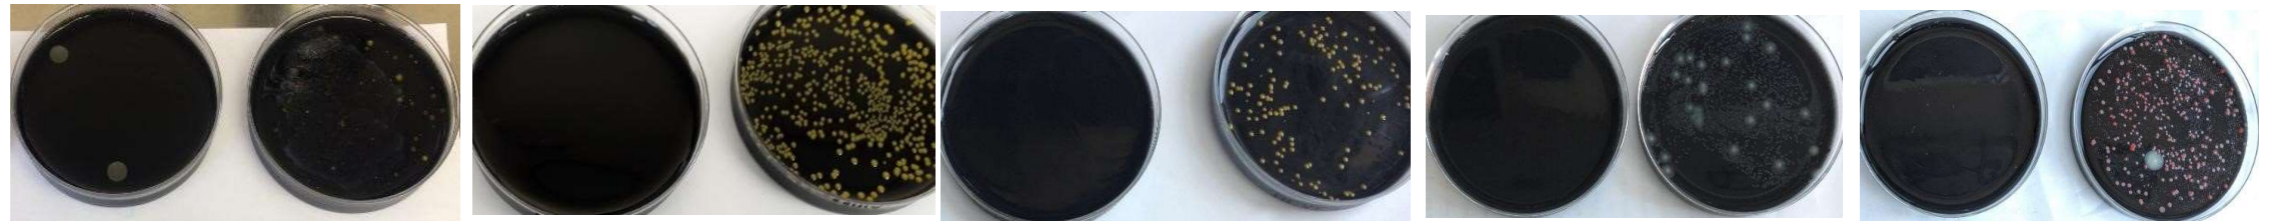

**EXAMPLES OF SAMPLES WITH OVERGROWTH ON BOTH AGAR MEDIA**

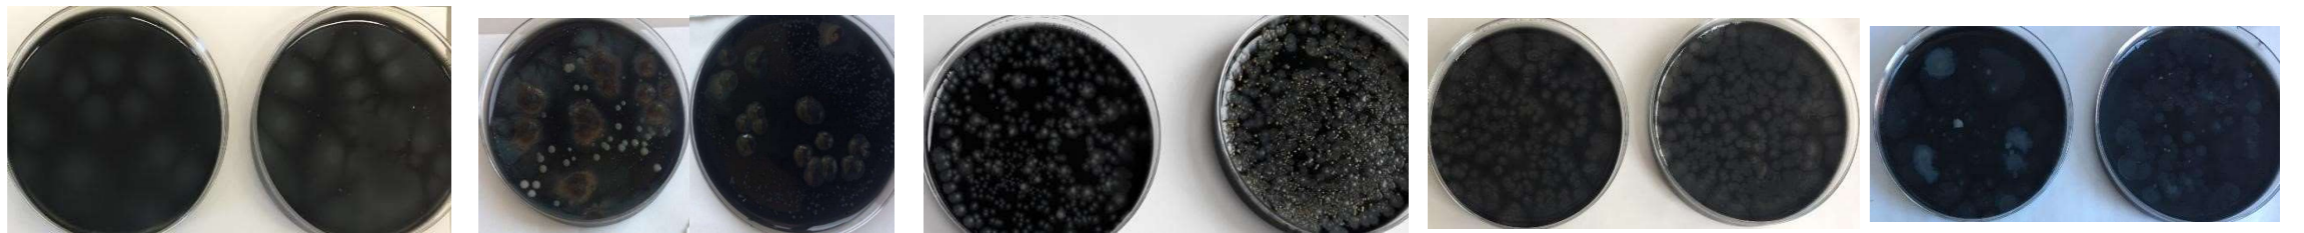

*Comparison of BCYE $\alpha$ +AB Agar and MWY agar for Detection and Enumeration of Legionella spp. in hospital water samples*  
Savina Ditommaso, Monica Giacomuzzi, Gabriele Memoli, Jacopo Garlasco and Carla M. Zotti<sup>1</sup>

Corresponding author: savina.ditommaso@unito.it; Department of Public Health and Pediatrics, University of Turin, 10100 Turin, Italy
